# Supplementary material for: Ibrutinib selectively and irreversibly targets EGFR (L858R, Del19) mutant but is moderately resistant to EGFR (T790M) mutant NSCLC Cells
Source: PubMed Central journal article supplement (PMC4741607; doi:10.18632/oncotarget.5182), 2015-09-05
Supplement: oncotarget-06-31313-s001.pdf [file oncotarget-06-31313-s001.pdf]

**SUPPLEMENTARY MATERIALS**

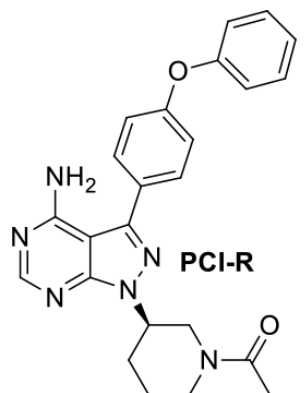

**Supplementary Figure S1: Chemical Structure of PCI-R.**

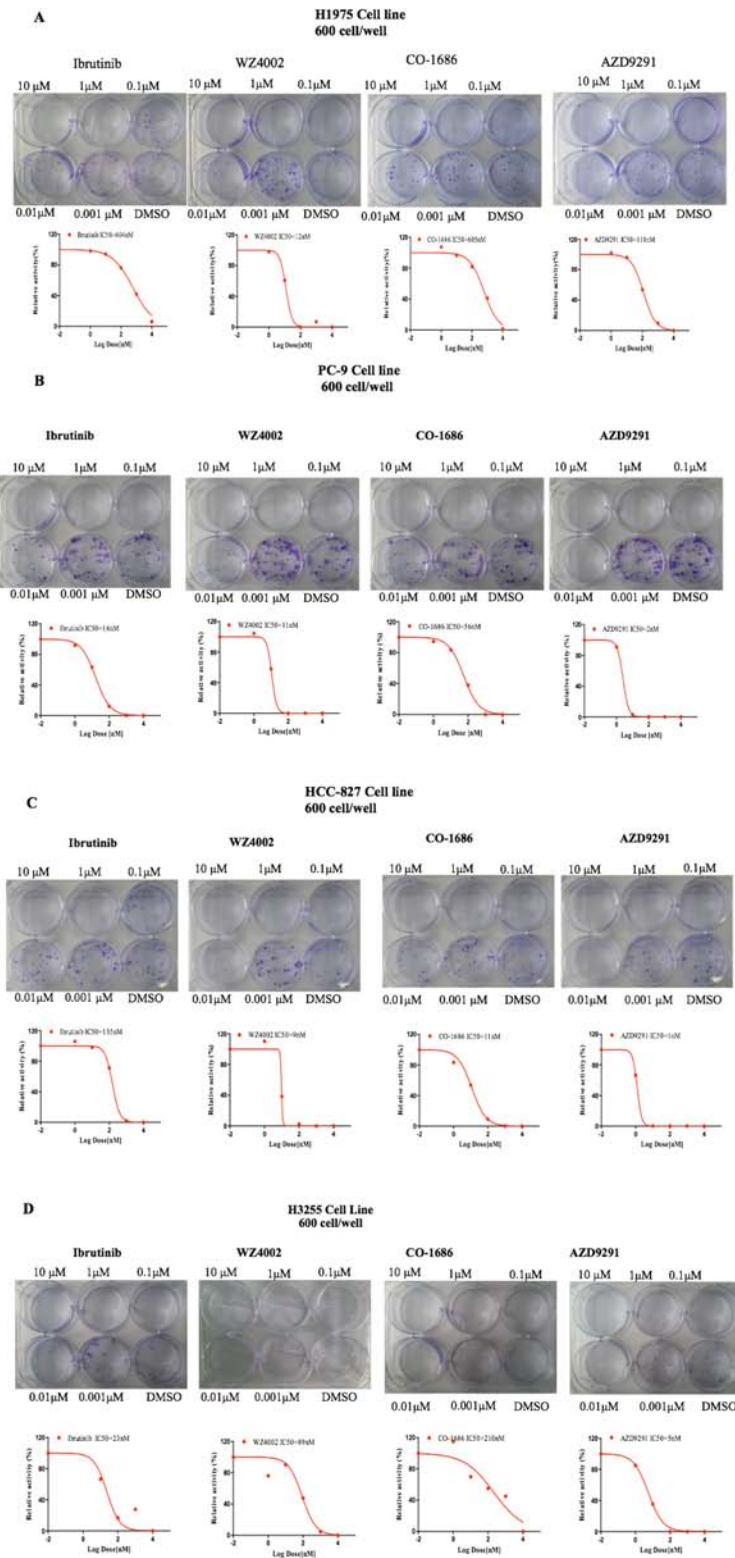

Supplementary Figure S2: Colony formation assay of EGFR inhibitors against EGFR mutant NSCLC cancer cell lines.

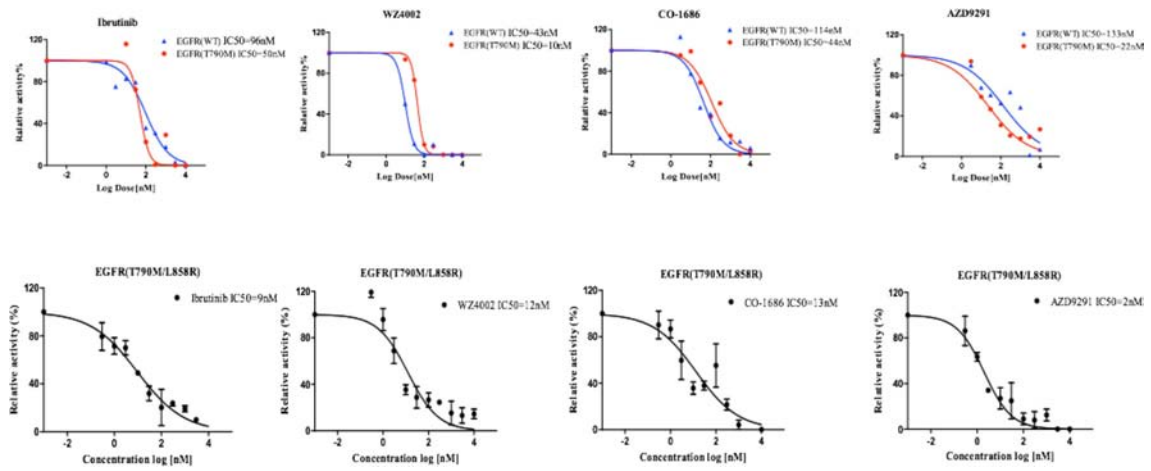

Supplementary Figure S3: ADP-Glo™ biochemical assay of Ibrutinib against EGFRwt, EGFR (T790M) and EGFR (L858R/T790M) proteins.

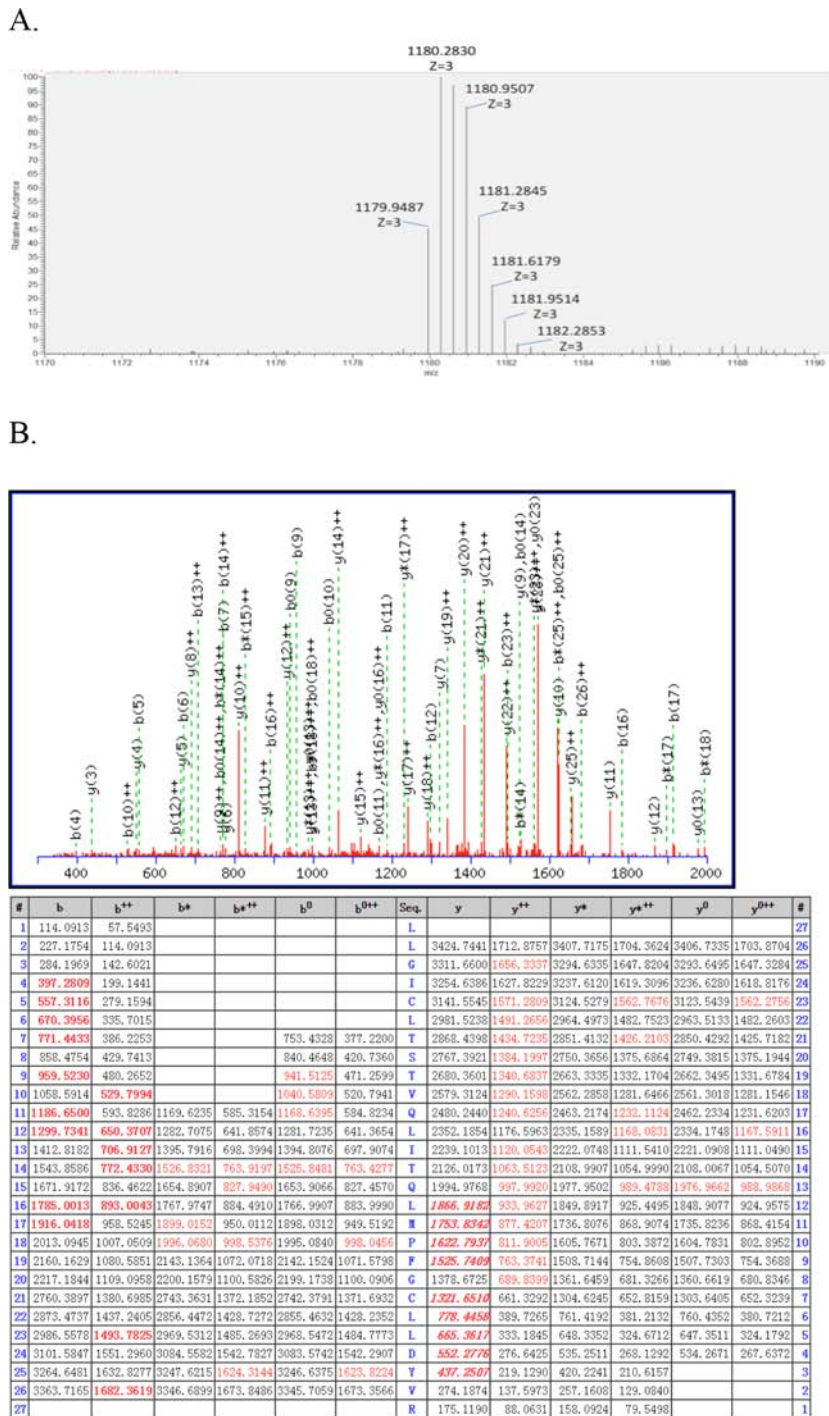

**Supplementary Figure S4: Ibrutinib forms a covalent bond with Cys797 of EGFR as determined by mass spectrometry.** A. LC-MS/MS identified a fully tryptic peptide LLGIC(781)LTSTVQLIM(790)QLMPF-GC(797)LLDYVR (m/z = 1179.9490 and z = 3+) with the probe modification on the Cys797 of EGFR-T790M; B. MS/MS spectrum and assigned fragment ions of the fully tryptic peptide (m/z = 1180.28 and z = 3+) with the Ibrutinib modification on Cys797 in EGFR-T790M. The MS/MS data were analyzed by Mascot with three differential modifications: Carbamidomethyl modification of 57.02146 on Cysteine, Ibrutinib modification of 440.1961 on Cysteine and “Thr to Met” modification on Threonine. The Mascot ion score of the adduct peptide is 76 and the MS/MS spectrum unambiguously assigned the Ibrutinib modification on Cys797;

(Continued)

C.

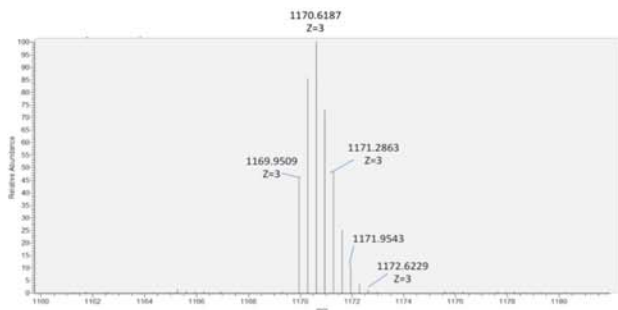

D.

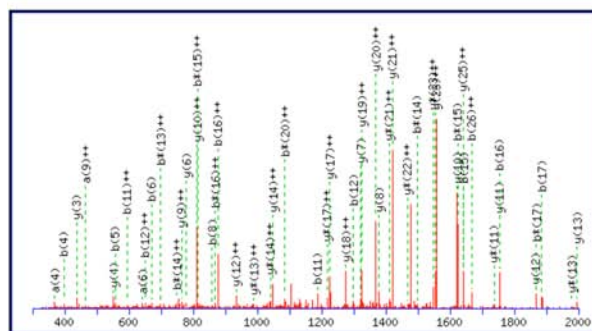

| #  | a         | a <sup>++</sup> | a <sup>+</sup> | a <sup>++</sup> | b         | b <sup>++</sup> | b <sup>+</sup> | b <sup>++</sup> | Seq. | y         | y <sup>++</sup> | y <sup>+</sup> | y <sup>++</sup> | #  |
|----|-----------|-----------------|----------------|-----------------|-----------|-----------------|----------------|-----------------|------|-----------|-----------------|----------------|-----------------|----|
| 1  | 86.0964   | 43.5519         |                |                 | 114.0913  | 57.5493         |                |                 | L    |           |                 |                |                 | 27 |
| 2  | 199.1805  | 100.0939        |                |                 | 227.1754  | 114.0913        |                |                 | L    | 3394.7513 | 1697.3793       | 3377.7247      | 1689.3660       | 26 |
| 3  | 256.2020  | 128.6046        |                |                 | 284.1969  | 142.6021        |                |                 | G    | 3281.6672 | 1641.3372       | 3264.6407      | 1632.8240       | 25 |
| 4  | 369.2860  | 185.1466        |                |                 | 397.2809  | 199.1441        |                |                 | I    | 3224.6458 | 1612.8265       | 3207.6192      | 1604.3132       | 24 |
| 5  | 529.3167  | 265.1620        |                |                 | 557.3116  | 279.1594        |                |                 | C    | 3111.5617 | 1556.2845       | 3094.5351      | 1547.7712       | 23 |
| 6  | 642.4007  | 321.7040        |                |                 | 670.3956  | 335.7015        |                |                 | L    | 2951.5310 | 1476.2692       | 2934.5045      | 1467.7599       | 22 |
| 7  | 743.4484  | 372.2278        |                |                 | 771.4433  | 386.2253        |                |                 | T    | 2838.4470 | 1419.7271       | 2821.4204      | 1411.2139       | 21 |
| 8  | 830.4804  | 415.7439        |                |                 | 858.4754  | 429.7413        |                |                 | S    | 2737.3993 | 1369.2033       | 2720.3728      | 1360.6900       | 20 |
| 9  | 931.5281  | 466.2677        |                |                 | 959.5230  | 480.2652        |                |                 | T    | 2650.3673 | 1325.6873       | 2633.3407      | 1317.1740       | 19 |
| 10 | 1030.5965 | 515.8019        |                |                 | 1058.5914 | 529.7994        |                |                 | V    | 2549.3196 | 1275.1634       | 2532.2930      | 1266.6502       | 18 |
| 11 | 1158.6551 | 579.8312        | 1141.6286      | 571.3179        | 1186.6506 | 593.8286        | 1169.6295      | 585.3154        | Q    | 2450.2512 | 1225.6292       | 2433.2246      | 1217.1160       | 17 |
| 12 | 1271.7392 | 636.3732        | 1254.7126      | 627.8599        | 1299.7341 | 650.3701        | 1282.7075      | 641.8574        | L    | 2322.1926 | 1161.5999       | 2305.1661      | 1153.0867       | 16 |
| 13 | 1384.8232 | 692.9153        | 1367.7967      | 684.4020        | 1412.8182 | 706.9127        | 1395.7916      | 698.3994        | I    | 2209.1085 | 1105.0579       | 2192.0820      | 1096.5446       | 15 |
| 14 | 1485.8709 | 743.4391        | 1468.8444      | 734.9258        | 1513.8658 | 757.4366        | 1496.8293      | 748.9233        | T    | 2096.0245 | 1048.5159       | 2078.9979      | 1040.0026       | 14 |
| 15 | 1613.9295 | 807.4684        | 1596.9029      | 798.9551        | 1641.9244 | 821.4658        | 1624.8979      | 812.9526        | Q    | 1994.9768 | 997.9920        | 1977.9502      | 989.4788        | 13 |
| 16 | 1727.0136 | 864.0104        | 1709.9870      | 855.4971        | 1755.0085 | 878.0079        | 1737.9819      | 869.4946        | L    | 1866.9183 | 933.9627        | 1849.8917      | 925.4495        | 12 |
| 17 | 1858.0540 | 929.5307        | 1841.0275      | 921.0174        | 1886.0496 | 943.5281        | 1869.0224      | 935.0148        | M    | 1753.8348 | 877.4207        | 1736.8076      | 868.9074        | 11 |
| 18 | 1955.1068 | 978.0570        | 1938.0803      | 969.5438        | 1983.1017 | 992.0645        | 1966.0752      | 983.5412        | P    | 1622.7937 | 811.9065        | 1605.7671      | 803.3872        | 10 |
| 19 | 2102.1752 | 1051.5912       | 2085.1487      | 1043.0780       | 2130.1701 | 1065.5887       | 2113.1436      | 1057.0754       | F    | 1525.7409 | 763.3741        | 1508.7144      | 754.8608        | 9  |
| 20 | 2159.1967 | 1080.1020       | 2142.1701      | 1071.5887       | 2187.1916 | 1094.0994       | 2170.1650      | 1085.5862       | G    | 1378.6728 | 689.8399        | 1361.6459      | 681.3266        | 8  |
| 21 | 2702.4019 | 1351.7046       | 2685.3754      | 1343.1913       | 2730.3969 | 1365.7021       | 2713.3703      | 1357.1888       | C    | 1321.6516 | 661.3292        | 1304.6245      | 652.8159        | 7  |
| 22 | 2815.4860 | 1408.2466       | 2798.4956      | 1399.7334       | 2843.4809 | 1422.2441       | 2826.4544      | 1413.7308       | L    | 778.4458  | 389.7265        | 761.4192       | 381.2132        | 6  |
| 23 | 2928.5701 | 1464.7887       | 2911.5435      | 1456.2754       | 2956.5650 | 1478.7861       | 2939.5384      | 1470.2729       | L    | 665.3617  | 333.1845        | 648.3352       | 324.6712        | 5  |
| 24 | 3043.5970 | 1522.3021       | 3026.5705      | 1513.7889       | 3071.5919 | 1536.2996       | 3054.5654      | 1527.7863       | D    | 552.2776  | 276.6425        | 535.2511       | 268.1292        | 4  |
| 25 | 3206.6103 | 1603.8338       | 3189.6338      | 1595.3206       | 3234.6553 | 1617.8313       | 3217.6287      | 1609.3180       | Y    | 437.2807  | 219.1290        | 420.2241       | 210.6157        | 3  |
| 26 | 3305.7288 | 1653.3680       | 3288.7022      | 1644.8547       | 3333.7237 | 1667.3658       | 3316.6971      | 1658.8522       | V    | 274.1874  | 137.5973        | 257.1608       | 129.0840        | 2  |
| 27 |           |                 |                |                 |           |                 |                |                 | R    | 175.1190  | 88.0631         | 158.0924       | 79.5498         | 1  |

**Supplementary Figure S4: (Continued).** C. LC-MS/MS identified a fully tryptic peptide LLGIC(781)LTSTVQLIT(790)QLMPFGC(797)LLDYVR ( $m/z = 1169.9512$  and  $z = 3+$ ) with the probe modification on Cys797 of wild-type EGFR. D. MS/MS spectrum and assigned fragment ions of the fully tryptic peptide ( $m/z = 1170.62$  and  $z = 3+$ ) with the Ibrutinib modification on Cys797 in wild-type EGFR. The MS/MS data were analyzed by Mascot with three differential modifications: Carbamidomethyl modification of 57.02146 on Cysteine, Ibrutinib modification of 440.1961 on Cysteine and “Thr to Met” modification on Threonine. The Mascot ion score of the adduct peptide is 51 and the MS/MS spectrum unambiguously assigned the Ibrutinib modification on Cys797.

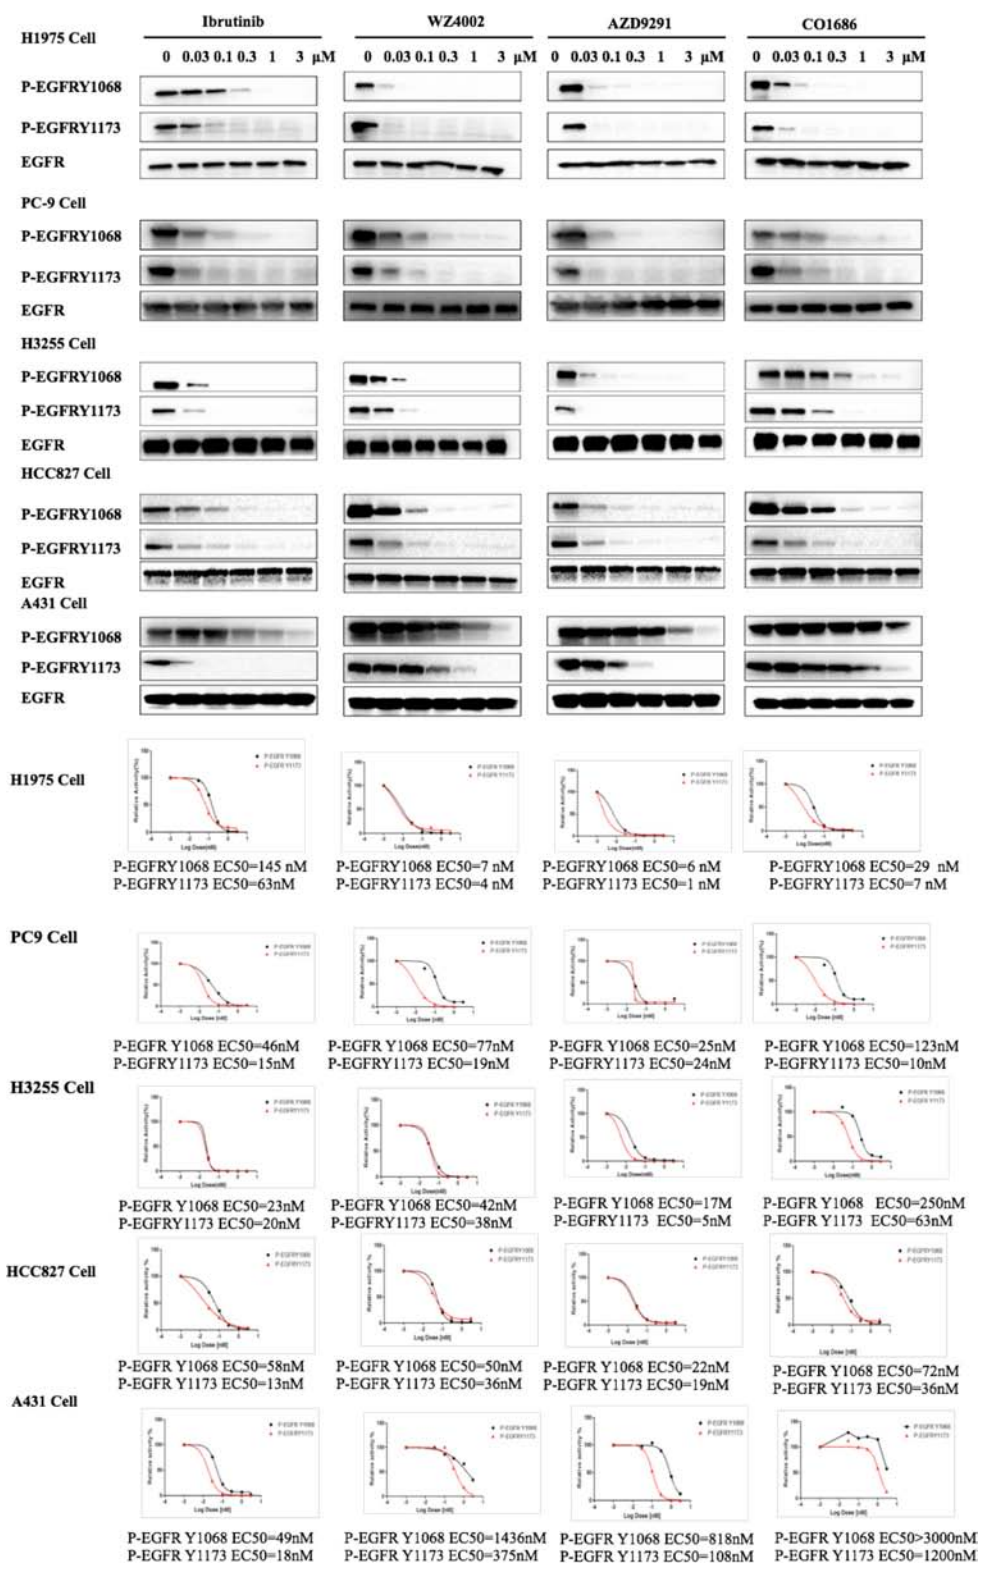

Supplementary Figure S5: Effect of Ibrutinib, WZ4002, AZD9291 and CO1686 on EGFR phosphorylation of tyrosines 1068 and 1173 in EGFR-dependent cancer cell lines.

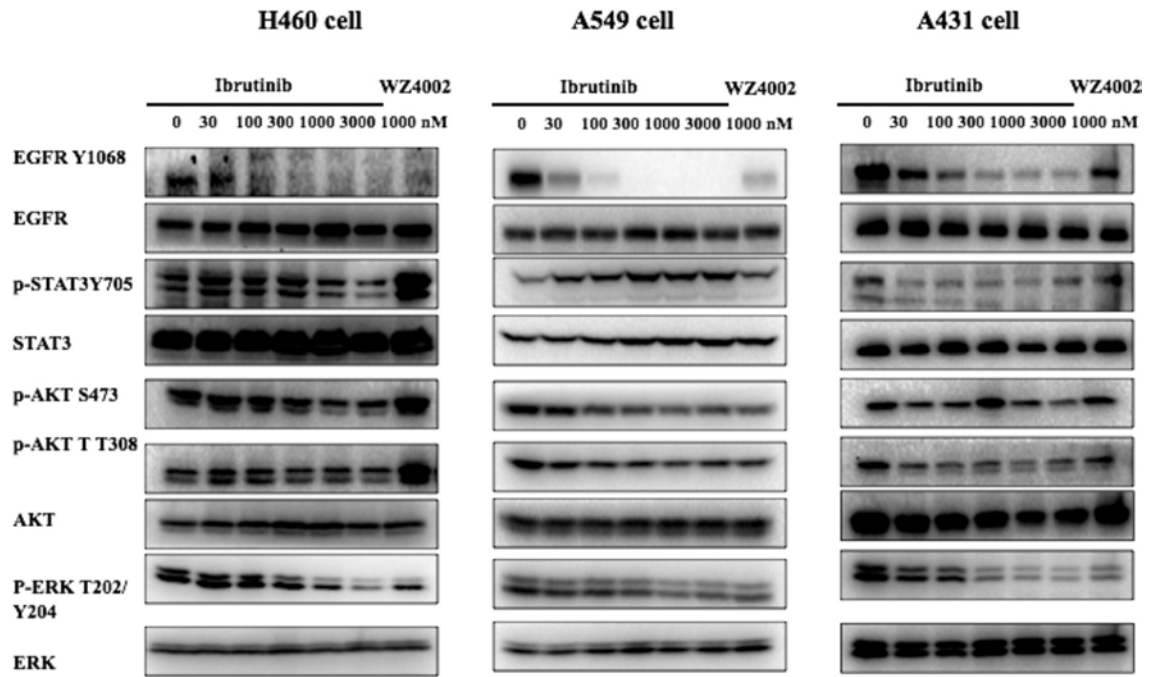

Supplementary Figure S6: Ibrutinib inhibitory effect on EGFR wt mediated signaling pathway.

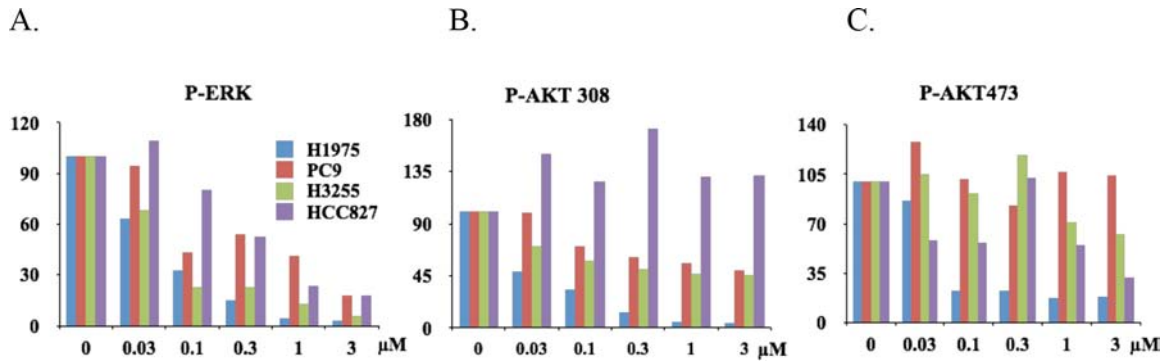

Supplementary Figure S7: Quantification of pERK, pAKT 308/473 and pSrc in drug treated EGFR mutant cell lines.



**IC50 of Ibrutinib against PIK3CA/D/G**

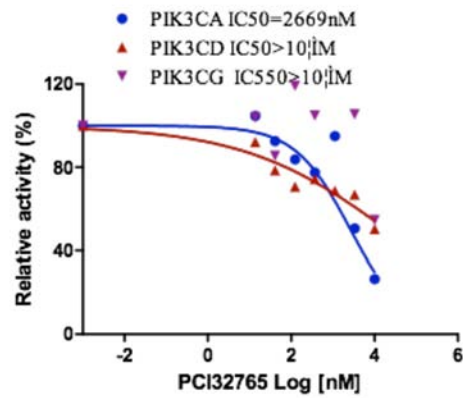

|          | PIK3CA | PIK3CB | PIK3CD | PIK3CG |
|----------|--------|--------|--------|--------|
| PCI32765 | 2669nM | NA     | >10µM  | >10µM  |

Supplementary Figure S8: Ibrutinib inhibitory effect on PI3K kinases by ADP-Glo™ Assay.

**A.**

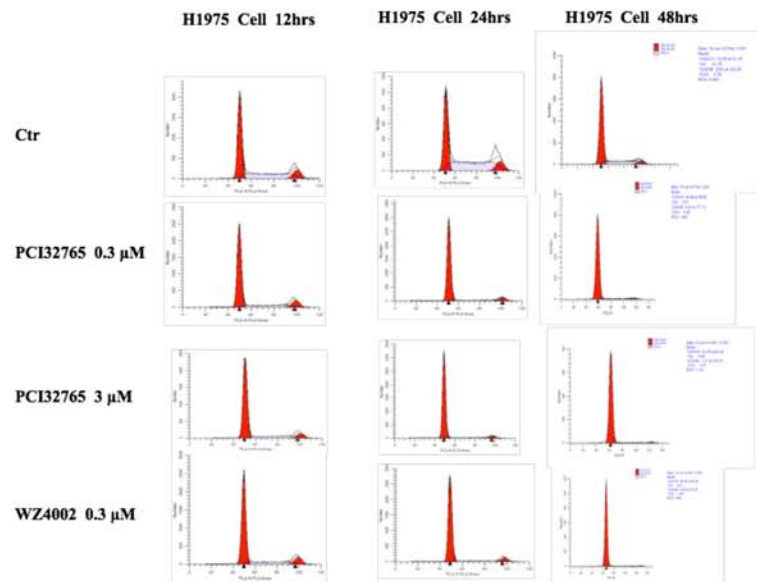

**B.**

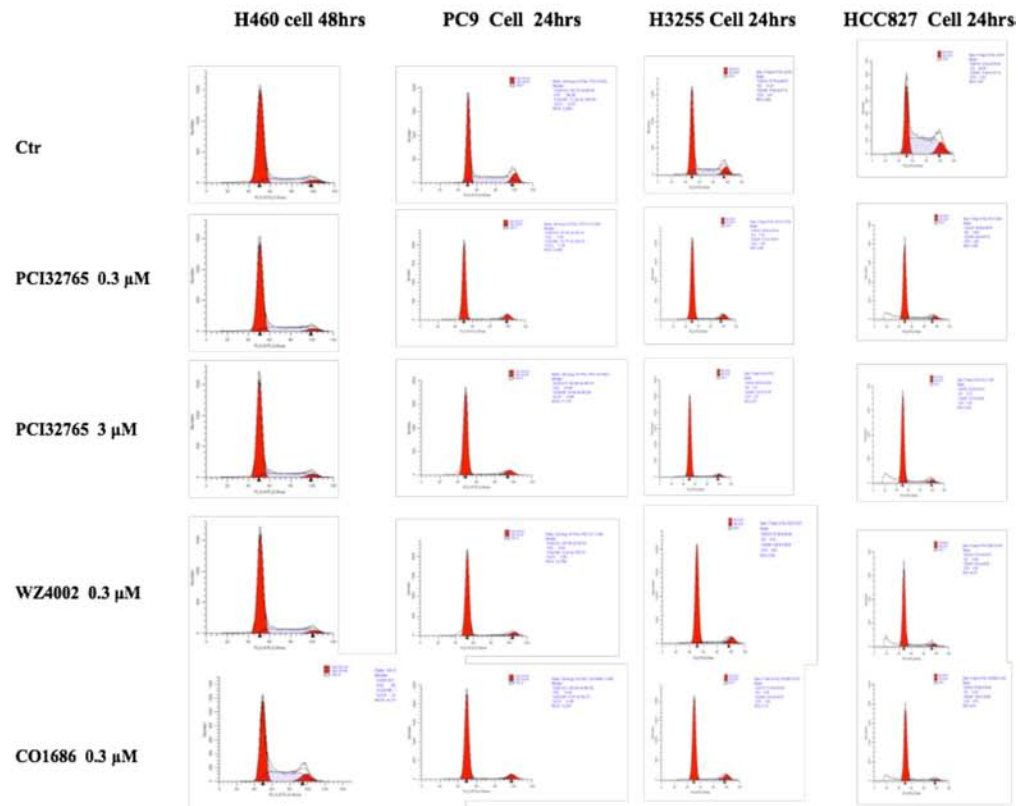

**Supplementary Figure S9: Ibrutinib effect on cell cycle progression as determined by fluorescence activated cell sorting (FACS).** A. Ibrutinib arrest cell cycle in H1975 cell line B. Ibrutinib arrest cell cycle in PC-9, H3255, HCC827 but not H460 cell lines

(Continued)

## C.

| Cell line/Drugs          | H1975 Cell line (12h) |       | H1975 Cell line (24h) |       | H1975 Cell line (48h) |       |
|--------------------------|-----------------------|-------|-----------------------|-------|-----------------------|-------|
| Cell line/Drugs          | %G0-G1                | %G2-M | %G0-G1                | %G2-M | %G0-G1                | %G2-M |
| ctr                      | 54.25                 | 10.77 | 42.2                  | 9.89  | 72.59                 | 5.63  |
| Ibrutinib<br>0.3 $\mu$ M | 69.44                 | 10.92 | 81.96                 | 6.76  | 92.06                 | 2.43  |
| Ibrutinib 3 $\mu$ M      | 74.28                 | 8.07  | 86.20                 | 4.83  | 93.79                 | 1.31  |
| WZ4002<br>0.3 $\mu$ M    | 70.4                  | 10.17 | 80.35                 | 7.63  | 94.64                 | 0.95  |

## D.

| Cell line/Drugs       | H460<br>Cell<br>Line<br>(48h) |       | PC-9 Cell<br>Line (24h) |       | H3255 Cell<br>Line (24h) |       | HCC827<br>Cell Line<br>(24 h) |       |
|-----------------------|-------------------------------|-------|-------------------------|-------|--------------------------|-------|-------------------------------|-------|
| % cell cycle<br>stage | %G0-<br>G1                    | %G2-M | %G0-G1                  | %G2-M | %G0-G1                   | %G2-M | %G0-G1                        | %G2-M |
| ctr                   | 72.64                         | 4.67  | 50.73                   | 11.22 | 57.79                    | 10.98 | 33.53                         | 11.46 |
| Ibrutinib0.3 $\mu$ M  | 69.88                         | 5.02  | 81.91                   | 10.77 | 82.82                    | 9.73  | 78.26                         | 6.86  |
| Ibrutinib 3 $\mu$ M   | 70.49                         | 5.09  | 84.9                    | 8.54  | 89.05                    | 5.24  | 80.37                         | 5.91  |
| WZ4002<br>0.3 $\mu$ M | 71.39                         | 5.15  | 87.95                   | 6.24  | 81.96                    | 9.90  | 79.74                         | 5.62  |
| CO1686<br>0.3 $\mu$ M | 51.62                         | 8.78  | 85.49                   | 8.97  | 81.24                    | 9.84  | 83.96                         | 3.62  |

**Supplementary Figure S9: (Continued).** C. Quantification of Ibrutinib arrest cell cycle in H1975 cell line D. Quantification of Ibrutinib arrest cycle in PC-9, H3255, HCC927 and H460 cell line

**Supplementary Table S1: Effect of ibrutinib on colony formation in EGFR mutant NSCLC cancer cell lines.**

| Drug/Cell lines<br>(EC <sub>50</sub> : nM) | H1975<br>EGFR (L858R/<br>T790M) | PC-9<br>EGFR del 19 | HCC827<br>EGFR Del 19 | H3255<br>EGFR L858R |
|--------------------------------------------|---------------------------------|---------------------|-----------------------|---------------------|
| ibrutinib                                  | 604.7                           | 16.14               | 155.3                 | 23.40               |
| WZ4002                                     | 12.18                           | 11.11               | 9.649                 | 89.06               |
| CO-1686                                    | 605.8                           | 56.25               | 11.51                 | 210.8               |
| AZD9291                                    | 118.1                           | 2.507               | 1.234                 | 5.592               |

**Supplementary Table S2: Ibrutinib combined with Trametinib against H1975 cell lines growth.**

|           |               | Trametinib |            |             |             |              |              |              |               |                |                |
|-----------|---------------|------------|------------|-------------|-------------|--------------|--------------|--------------|---------------|----------------|----------------|
| PCI-32765 |               | DMSO       | 10 $\mu$ M | 3.3 $\mu$ M | 1.1 $\mu$ M | 0.37 $\mu$ M | 0.12 $\mu$ M | 0.04 $\mu$ M | 0.014 $\mu$ M | 0.0045 $\mu$ M | 0.0015 $\mu$ M |
|           |               | 100        | 20.59      | 66.83       | 77.20       | 80.79        | 78.86        | 79.50        | 77.33         | 77.24          | 82.21          |
|           | 3.3 $\mu$ M   | 24.22      | 3.65       | 13.55       | 20.98       | 20.73        | 22.68        | 21.58        | 21.23         | 18.24          | 18.13          |
|           | 1.1 $\mu$ M   | 34.56      | 6.99       | 18.20       | 26.69       | 28.00        | 30.35        | 31.81        | 27.27         | 24.20          | 24.73          |
|           | 0.37 $\mu$ M  | 43.77      | 13.98      | 27.96       | 37.80       | 43.93        | 41.62        | 41.01        | 35.86         | 33.13          | 33.73          |
|           | 0.12 $\mu$ M  | 77.65      | 16.76      | 43.52       | 56.41       | 57.51        | 59.86        | 55.01        | 47.42         | 49.09          | 50.42          |
|           | 0.040 $\mu$ M | 103.98     | 39.99      | 61.08       | 66.36       | 66.06        | 66.37        | 61.66        | 63.65         | 64.53          | 64.97          |
